# Supplementary material for: Detecting QTL and Candidate Genes for Plant Height in Soybean via Linkage Analysis and GWAS
Source: Front Plant Sci. 2022 Jan 21;12:803820. doi: 10.3389/fpls.2021.803820 (PMC8813865; doi:10.3389/fpls.2021.803820)
Supplement: Supplementary file 1 [file Table_1.xlsx]

## Sheet: Table S1
Supplementary Table S1. Summary of planting conditions of 12 environments.
Environment	Location	Group type	Experimental treatment
			Density (×105plant/hm2)	N/P2O5/K2O Fertilizer (kg/hm2)	Sowing date
E1	Harbin	RIL6013	28	18/46/30	2015.05.10
E2	Harbin	RIL6013	32	18/46/30	2015.05.10
E3	keshan	RIL6013	28	18/46/30	2015.05.10
E4	keshan	RIL6013	32	18/46/30	2015.05.10
E5	Shuangcheng	RIL6013	22	18/46/30	2016.05.10
E6	Shuangcheng	RIL6013	25	18/46/30	2016.05.10
E7	Shuangcheng	RIL6013	22	36/92/60	2016.05.10
E8	Harbin	RIL6013	22	18/46/30	2016.05.07
E9	Shuangyashan	Germplasm	22	18/46/30	2018.05.10
E10	Shuangyashan	Germplasm	22	18/46/30	2019.05.10
E11	Harbin	Germplasm	22	18/46/30	2018.05.10
E12	Harbin	Germplasm	22	18/46/30	2019.05.10

## Sheet: Table S2
Supplementary Table S2. Primer sequences used for qPCR analysis of three differentially expressed genes.
Primers name	Sequence
02G132200-Q-F	GTTTATGGAGATCATTGCCA
02G132200-Q-R	TGTTGTTGTTTCTTGTGTTTC
02G133000-Q-F	GGCCGAAGAATGTATTTCC
02G133000-Q-R	TCAAATCAACCACCCTGAA
05G240600-Q-F	TGTTTTCAGTTGTGGTTACC
05G240600-Q-R	TCTATGGATTGAAAGCCTTTG
FBOX-Q-F	TTGTTTATCAGAGTTGCACG
FBOX-Q-R	TCAATCCCATCCAGAATCAA

## Sheet: Table S3
Supplementary Table S3. Detailed information of 28 QTLs from linkage analysis in single environment in RIL 6013.
QTL	Env.	Chr.	Position(cM)	Marker Intrerval	LODa	PVE（%）b	ADDc	Confidence interval （cM）	Physical Region (Mb)	Method
qPH-1-3	E3	1	131.599	60c01068-60c01073	2.5354	1.0649	9.2464	122.45-138.85	54.71-55.41	IM
qPH-1-2	E3	1	62.5996	60c01053-60c01054	3.2865	0.6584	7.6077	60.75-63.65	49.29-49.48	IM
qPH-3-4	E5	3	111.399	60c03047-60c03055	2.8264	2.1448	15.4053	111.35-112.35	34.47-36.98	IM
qPH-3-3	E5	3	92.0992	60c03041-60c03042	2.7409	2.1402	15.3676	91.85-92.35	31.57-33.99	IM
qPH-3-2	E3	3	68.6995	60c03027-60c03030	2.5451	1.8292	13.0243	56.25-74.45	12.50-18.70	IM
qPH-3-1	E5	3	24.7001	60c03012-60c03017	3.0146	2.3084	14.6328	24.65-24.95	4.42-5.20	IM
qPH-4-1	E4	4	11.4	60c04013-60c04014	2.629	2.0339	-5.2336	7.85-11.75	1.73-1.97	IM
qPH-5-4	E2/E2	5	87.50/87.50	60c05058-60c05061	2.69/2.69	2.98/2.98	15.09/15.09	87.05-87.95/87.05-87.95	40.91-41.75	IM/ICIM
qPH-5-3	E3	5	84.1993	60c05057-60c05054	2.5149	1.0142	18.47	83.75-84.35	40.03-40.91	IM
qPH-5-2	E8	5	83.1993	60c05052-60c05053	3.4785	0.8662	40.7308	82.75-84.05	37.91-40.03	IM
qPH-5-1	E5	5	82.9993	60c05049-60c05050	4.2245	3.1775	41.2605	82.75-83.35	36.55-37.38	IM
qPH-6-2	E3/E3	6	69.90/69.90	60c06045-60c06046	3.48/3.48	0.69/10.24	7.13/7.13	68.75-71.35/68.75-70.65	12.57-12.83	IM/ICIM
qPH-6-1	E3	6	27.7001	60c06009-60c06010	2.9964	0.6698	6.8132	25.65-31.55	1.72-2.77	IM
qPH-10-2	E3	10	58.2997	60c10042-60c10049	2.5436	2.5951	16.6618	53.15-63.35	37.41-39.50	IM
qPH-10-1	E7/E7	10	48.60/48.60	60c10039-60c10047	2.63/2.63	8.54/8.54	23.04/23.04	48.15-48.95/48.15-48.65	35.64-39.35	IM/ICIM
qPH-13-1	E3	13	109.099	60c13106-60c13107	2.7079	0.5797	6.6403	107.25-109.75	31.99-32.23	IM
qPH-14-6	E3	14	114.299	60c14067-60c14068	2.638	0.5476	6.1321	113.65-114.65	46.86-47.62	IM
qPH-14-5	E3	14	59.9997	60c14043-60c14041	3.2568	1.6983	12.3312	54.65-70.45	15.01-22.33	IM
qPH-14-4	E4	14	50.0998	60c14036-60c14032	3.0279	2.3258	21.0881	49.25-50.15	8.65-10.17	IM
qPH-14-3	E3	14	38.4	60c14031-60c14035	3.9317	1.6432	11.9874	29.65-43.85	8.32-10.06	IM
qPH-14-2	E3	14	2.6	60c14008-60c14010	2.6716	0.9986	19.4476	2.15-2.75	2.99-4.38	IM
qPH-14-1	E4/E4	14	2.50/2.50	60c14003-60c14001	2.98/2.83	2.39/9.69	21.16/19.71	1.75-2.55/1.75-2.55	0.00-2.10	IM/ICIM
qPH-15-3	E8	15	53.0998	60c15016-60c15017	3.4313	0.8865	40.29	51.85-53.05	5.35-5.73	IM
qPH-15-2	E5	15	53.1998	60c15017-60c15015	4.2497	3.18	41.2692	52.25-53.75	5.21-5.73	IM
qPH-15-1	E3/E3	15	18.90/18.80	60c15002-60c15003	3.06/2.50	0.75/8.30	16.42/13.97	17.75-20.15/14.15-20.25	1.14-1.78	IM/ICIM
qPH-18-4	E5	18	77.3994	60c18059-60c18060	4.3545	13.6446	24.1372	76.35-77.45	49.33-49.61	ICIM
qPH-18-2	E4	18	41.0999	60c18046-60c18047	3.028	2.3256	21.0882	40.75-41.45	18.19-41.52	IM
qPH-18-1	E4	18	38.9	60c18041-60c18043	3.0183	2.3278	21.071	38.85-39.55	8.61-9.29	IM
aLOD,logarithm of odds.
bPVE,phenotypic variation explained by QTL.
cADD,contribution of parents to the additive effect.

## Sheet: Table S4
Supplementary Table S4. Detailed information of 15 candidate genes in QTL or QTN genome regions annotated by KEGG database.
QTL or QTN name	Gene name	Chromosome	Position	KO number	Annotation
qPH-2-1	Glyma.02G132600.1	Chr02	13737648..13738216	K19891	GN1_2_3; glucan endo-1,3-beta-glucosidase 1/2/3 [EC:3.2.1.39]
qPH-2-1	Glyma.02G132900.1	Chr02	13755939..13758897	K22521	SCO2; protein disulfide-isomerase [EC:5.3.4.1]
qPH-2-1	Glyma.02G133400.1	Chr02	13780567..13793313	K17906	ATG2; autophagy-related protein 2
qPH-2-1	Glyma.02G134600.1	Chr02	13920517..13925444	K00924	E2.7.1.-; kinase [EC:2.7.1.-]
qPH-2-1	Glyma.02G134800.1	Chr02	13958441..13963538	K05864	PPID, CYPD; peptidyl-prolyl isomerase D [EC:5.2.1.8]
AX-90484715	Glyma.05G240500.1	Chr05	41562811..41565666	K09419	HSFF; heat shock transcription factor, other eukaryote
AX-90484715	Glyma.05G240700.1	Chr05	41572819..41576662	K00133	asd; aspartate-semialdehyde dehydrogenase [EC:1.2.1.11]
AX-90484715	Glyma.05G240800.1	Chr05	41579557..41582577	K11096	SNRPD2, SMD2; small nuclear ribonucleoprotein D2
AX-90484715	Glyma.05G241100.1	Chr05	41608543..41614319	K11518	TOM40; mitochondrial import receptor subunit TOM40
AX-90484715	Glyma.05G241200.1	Chr05	41615990..41617306	K02960	RP-S16e, RPS16; small subunit ribosomal protein S16e
AX-90484715	Glyma.05G241300.1	Chr05	41618611..41620223	K20044	PICALM; phosphatidylinositol-binding clathrin assembly protein
AX-90484715	Glyma.05G241400.1	Chr05	41620299..41639644	K12879	THOC2; THO complex subunit 2
AX-90349538	Glyma.14G051200.1	Chr14	4005886..4011859	K04459	DUSP, MKP; dual specificity MAP kinase phosphatase [EC:3.1.3.16 3.1.3.48]
AX-90349538	Glyma.14G051300.1	Chr14	4020877..4025409	K00784	rnz; ribonuclease Z [EC:3.1.26.11]
AX-90349538	Glyma.14G051400.1	Chr14	4026306..4031542	K05399	LBP; lipopolysaccharide-binding protein
						6

## Sheet: Table S5
Supplementary Table S5. Plant height of 6 varieties at different times
Variety	PH at R1 (cm)	PH at day 10 (cm)	PH at day 20 (cm)	PH at day 30 (cm)
HN400	26.5	34.8333	54.2333	74
HN451	23.5	37	59.6667	74.4667
HeNong60	28.3333	36.6667	61.5	65.4333
HN369	30.5	55	93	137.9
HN477	27.5	53.3333	91.4333	140.733
DongNongL13	31.1667	58.3333	105.167	145.267
